# Supplementary material
Source: PubMed Central journal article supplement (PMC3280486)
Supplement: 97320630007328S1.pdf [file 97320630007328S1.pdf]

## Supplementary material:

**Table: 1** List of software and servers used and their purpose of use

| Residue | Mutated to | Mutation energy(kcal/mol) | Effect        |
|---------|------------|---------------------------|---------------|
| MET414  | VAL        | 0.91                      | destabilizing |
| GLN446  | ASP        | 0.42                      | neutral       |
| ILE447  | MET        | 0.07                      | neutral       |
| TYR555  | ALA        | -0.16                     | neutral       |
| SER556  | GLY        | 0.11                      | neutral       |
